# Supplementary material for: Synthesis of Yttria-Stabilized Zirconia Nanospheres from Zirconium-Based Metal–Organic Frameworks and the Dielectric Properties
Source: MDPI journal article supplement (doi:10.3390/nano13010028), 2022-12-21
Supplement: s1 [file s1]

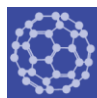

*Supplementary Materials*

# Synthesis of Yttria-Stabilized Zirconia Nanospheres from Zirconium-Based Metal–Organic Frameworks and the Dielectric Properties

Hyun Woo Park <sup>1,2,†</sup>, Eunyeong Cho <sup>1,3,†</sup>, Yun Zou <sup>4,5,†</sup>, Sea Hoon Lee <sup>4,5</sup>, Jae Ryung Choi <sup>1</sup>, Sang-Bok Lee <sup>1</sup>, Kyeongwoon Chung <sup>6</sup>, Se Hun Kwon <sup>2,\*</sup>, Jeonghun Kim <sup>3,\*</sup> and Hee Jung Lee <sup>1,\*</sup>

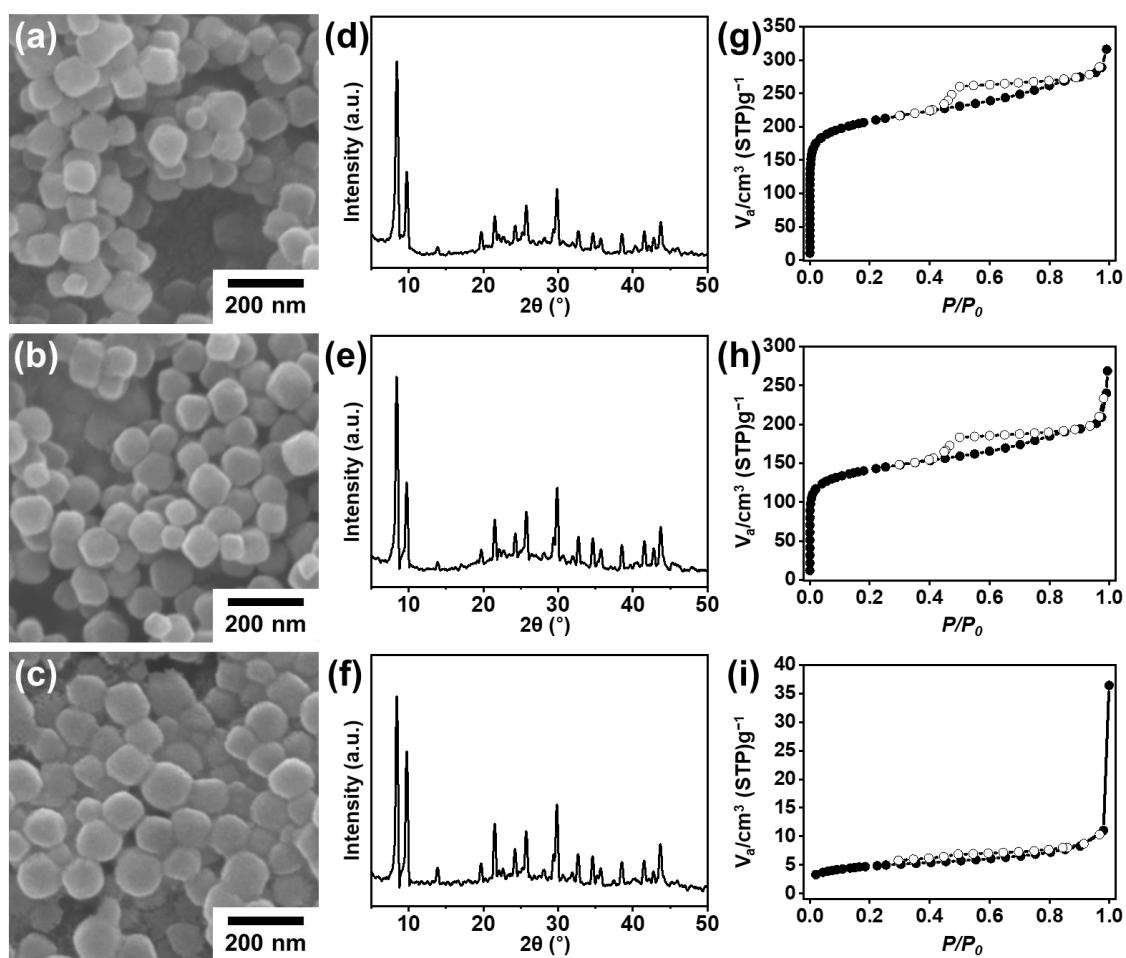

**Figure S1.** FE-SEM images, XRD patterns, and nitrogen adsorption/desorption isotherms of the YSZ precursors: (a,d,g) 3YSZ, (b,e,h) 8YSZ, and (c,f,i) 30YSZ.

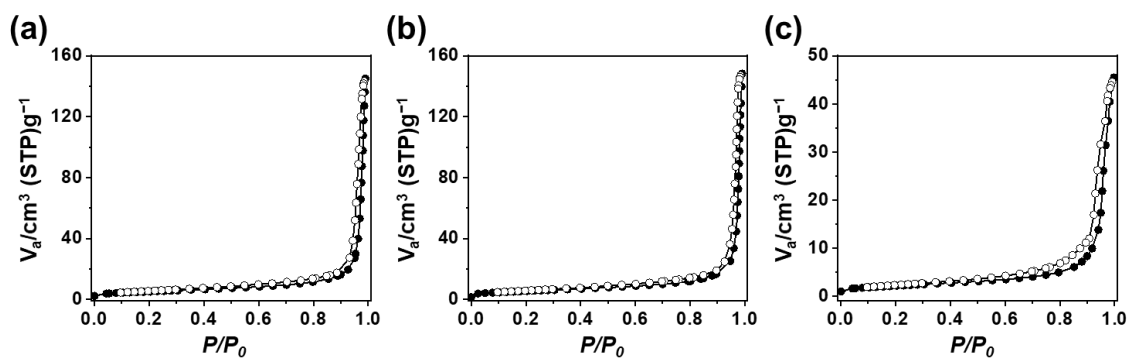

**Figure S2.** Nitrogen adsorption/desorption isotherms of the YSZ nanospheres: (a) 3YSZ, (b) 8YSZ, and (c) 30YSZ.

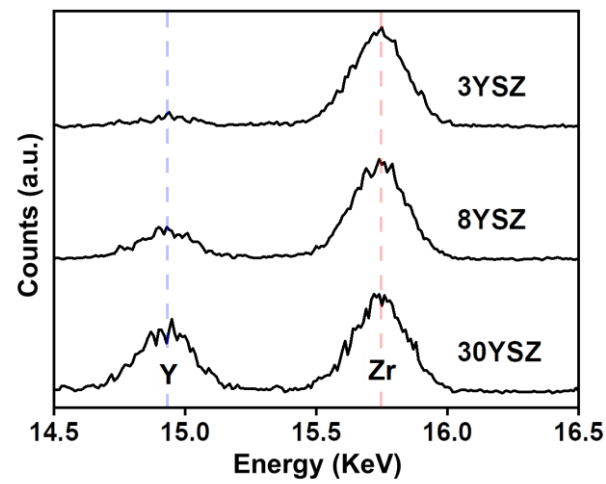

Figure S3. EDX spectra of the 3YSZ (top), 8YSZ (middle), and 30YSZ (bottom) nanospheres.

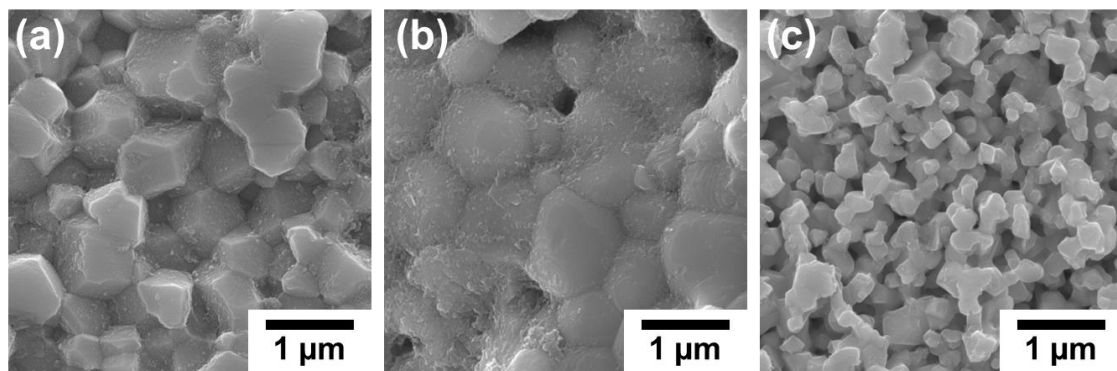

Figure S4. SEM images of the sintered YSZ bodies: (a) 3YSZ, (b) 8YSZ, and (c) 30YSZ.

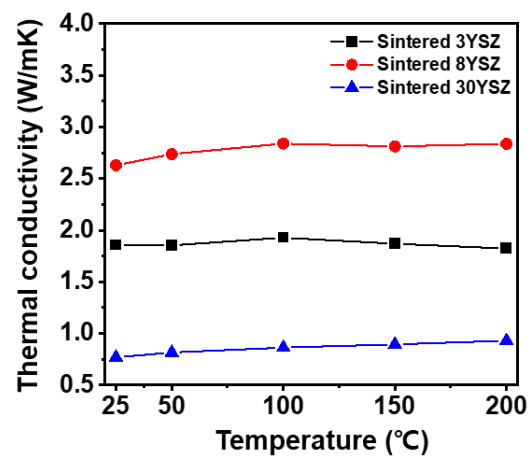

Figure S5. Thermal conductivity of the sintered YSZ bodies with various temperatures.
